# Supplementary material for: Supramolecular nanosolvent-based hollow fiber liquid phase microextraction as a novel method for simultaneous preconcentration of acidic, basic and amphiprotic pollutants
Source: Royal Society of Chemistry journal article supplement (doi:10.1039/c5ra23488c), 2016-01-01

**Supramolecular nano solvent-based hollow fiber liquid phase microextraction as a novel  
method for simultaneous preconcentration of acidic, basic and amphiprotic pollutants**

**Ali Akbar Asgharinezhad, Homeira Ebrahimzadeh\***

*Faculty of Chemistry, Shahid Beheshti University, G.C., Evin, Tehran, Iran*

\* Corresponding author. Tel.: +98 21 29902891; fax: +98 21 22403041.  
E-mail address: h-ebrahim@sbu.ac.ir (H. Ebrahimzadeh)

**Table 1S**

Results of analysis of variance (ANOVA)

| Source            | Sum of Squares | df | Mean Squares | F-value    | p-value<br>Prob > F |                 |
|-------------------|----------------|----|--------------|------------|---------------------|-----------------|
| Model             | 0.34           | 14 | 0.025        | 6.49       | 0.0004              | significant     |
| A-pH              | 0.058          | 1  | 0.058        | 15.42      | 0.0013              |                 |
| B-Extraction time | 9.434E-003     | 1  | 9.434E-003   | 2.49       | 0.1356              |                 |
| C-SUPRAS          | 2.963E-003     | 1  | 2.963E-003   | 0.78       | 0.3906              |                 |
| D-Salt            | 0.099          | 1  | 0.099        | 26.08      | 0.0001              |                 |
| AB                | 4.382E-006     | 1  | 4.382E-006   | 1.156E-003 | 0.9733              |                 |
| AC                | 4.521E-005     | 1  | 4.521E-005   | 0.012      | 0.9145              |                 |
| AD                | 2.829E-005     | 1  | 2.829E-005   | 7.461E-003 | 0.9323              |                 |
| BC                | 3.485E-005     | 1  | 3.485E-005   | 9.191E-003 | 0.9249              |                 |
| BD                | 2.692E-005     | 1  | 2.692E-005   | 7.100E-003 | 0.9340              |                 |
| CD                | 2.111E-005     | 1  | 2.111E-005   | 5.567E-003 | 0.9415              |                 |
| A <sup>2</sup>    | 0.011          | 1  | 0.011        | 3.00       | 0.1036              |                 |
| B <sup>2</sup>    | 0.050          | 1  | 0.050        | 13.22      | 0.0024              |                 |
| C <sup>2</sup>    | 0.14           | 1  | 0.14         | 36.73      | < 0.0001            |                 |
| D <sup>2</sup>    | 0.021          | 1  | 0.021        | 5.43       | 0.0341              |                 |
| Residual          | 0.057          | 15 | 3.792E-003   |            |                     |                 |
| Lack of Fit       | 0.048          | 10 | 4.778E-003   | 2.63       | 0.1492              | not significant |
| Pure Error        | 9.101E-003     | 5  | 1.820E-003   |            |                     |                 |
| Cor Total         | 0.04           | 29 |              |            |                     |                 |

**Fig. 1S:** DLS profile of size distributions of the supramolecular nano solvent.

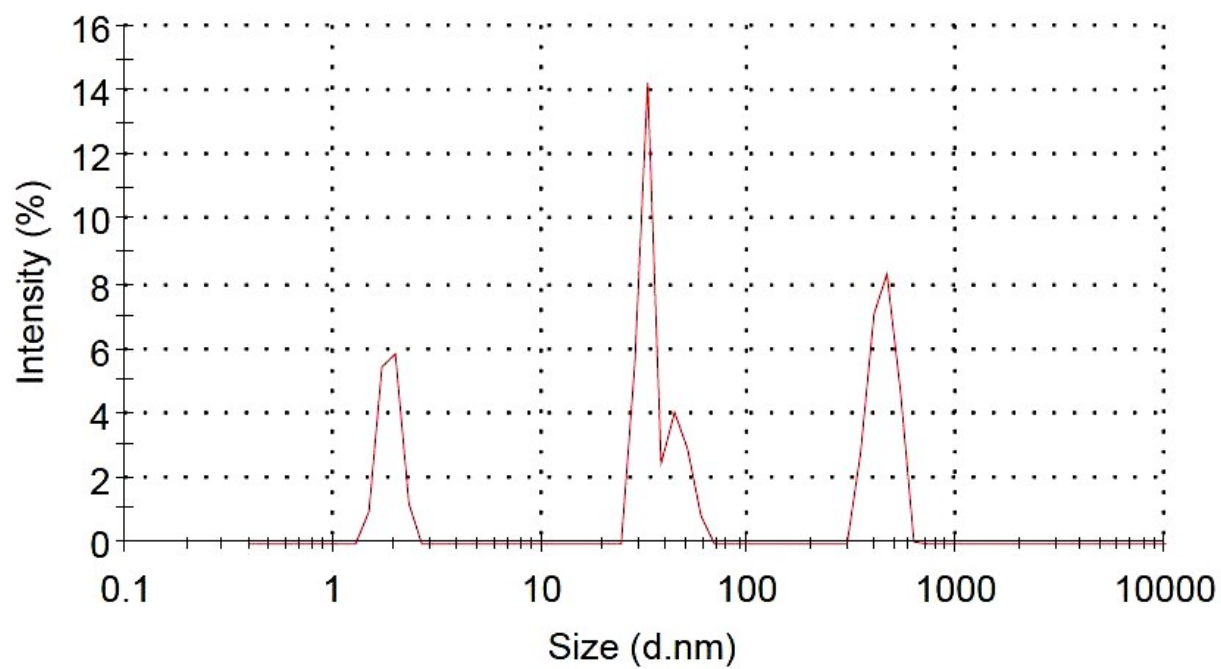

**Fig. 2S:** The chromatograms of (A): dam water sample (a) before spiking, (b) spiked at  $10 \mu\text{g L}^{-1}$  of each analytes and (B): wastewater sample (a) before spiking, (b) spiked at  $10 \mu\text{g L}^{-1}$  of each analytes, after SS-HF-LPME under opted conditions.

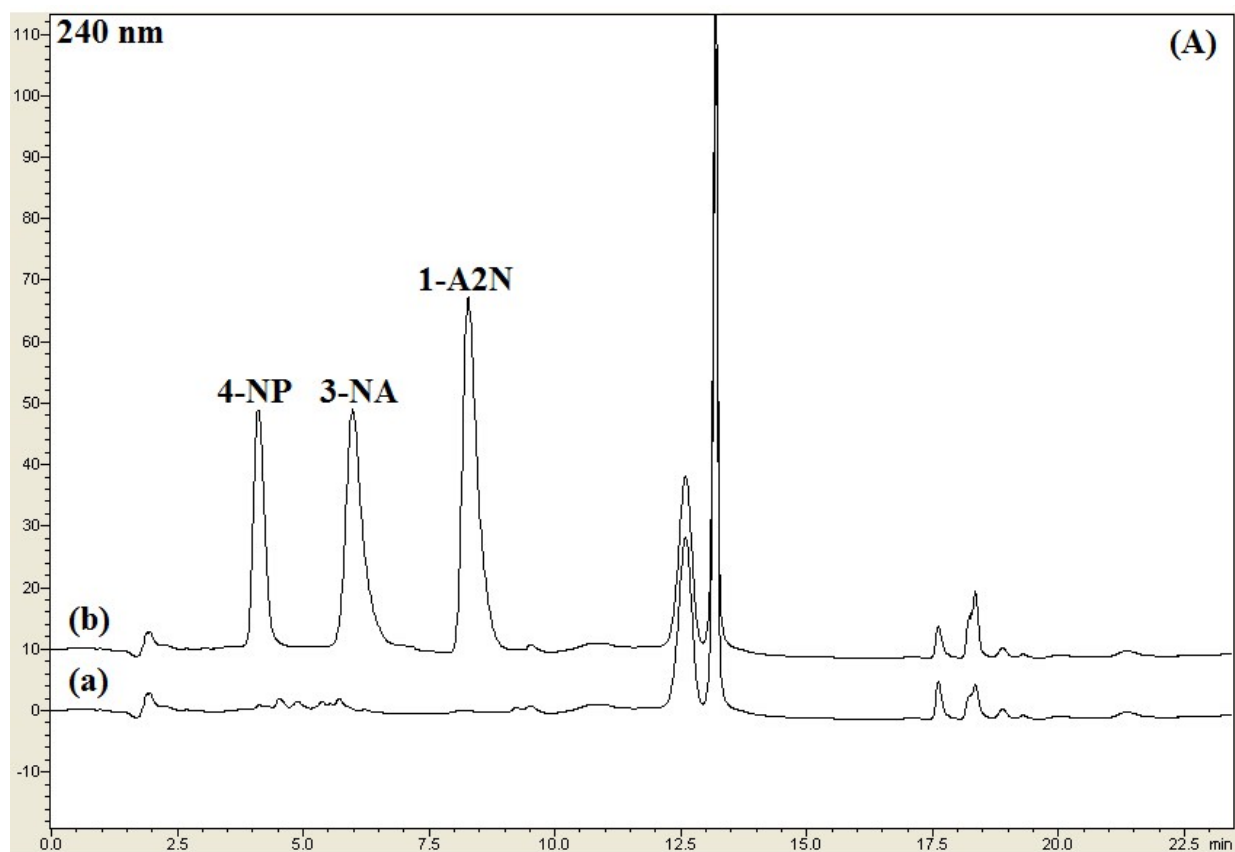

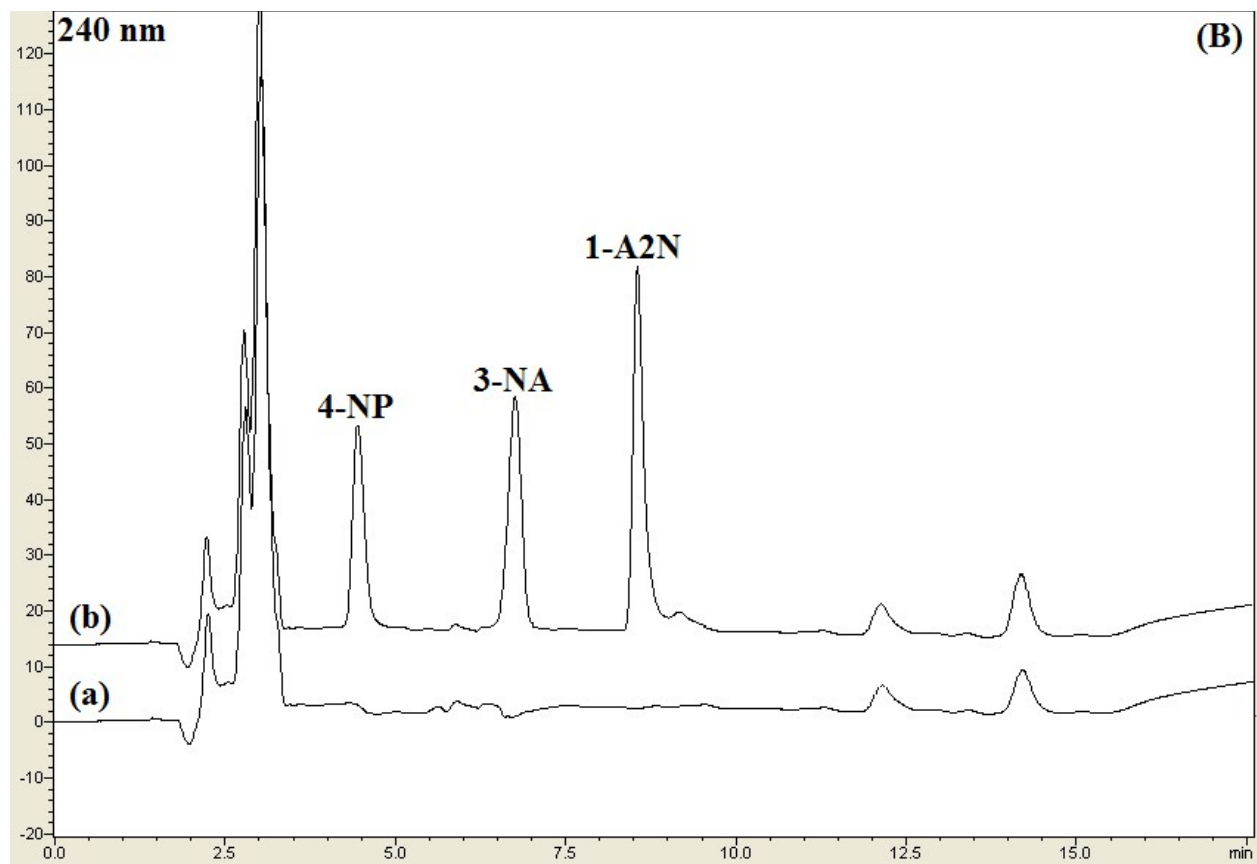

Supplement: c5ra23488c1.pdf [file c5ra23488c1.pdf]
